# Supplementary material
Source: publisher figshare collection journal article supplement (https://acs.figshare.com/ndownloader/files/13628063)
Supplement: Supplementary file 1 [file 13628063]

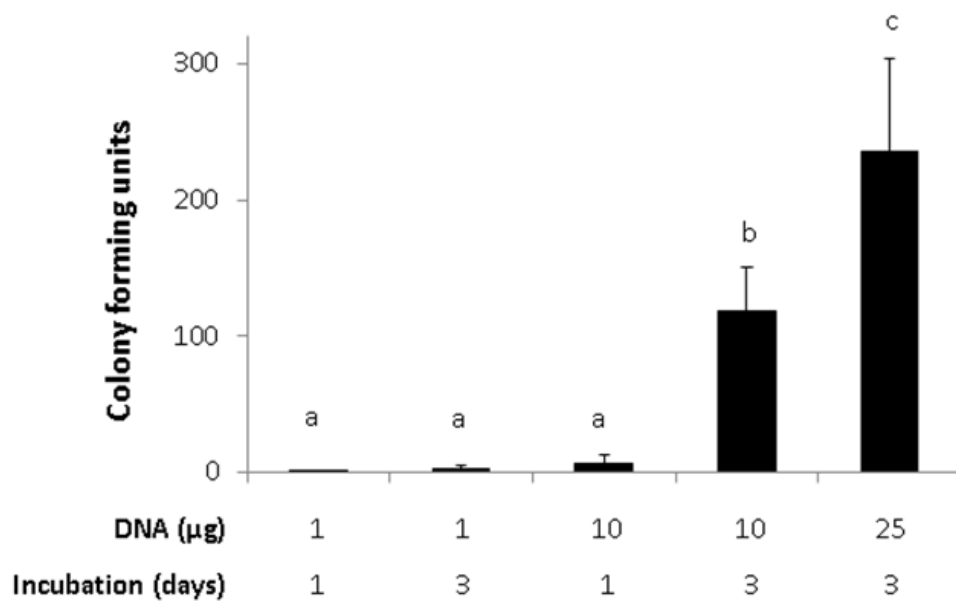

**Figure S1. Optimization of *Synechococcus* sp. PCC 7002 natural transformation.**

*Synechococcus* sp. PCC 7002 cultures were grown to an OD<sub>730</sub> of 1, transformed with variable amounts of DNA, and incubated for different lengths of time (indicated along the x-axis) before plating onto selective media. Colonies were counted after 12 days of incubation at 30 °C, 16 h/8 h day-night cycle with 150 µmol photons m<sup>-2</sup> s<sup>-1</sup> light intensity. Bars represent means ± S.E.M. of three independent experiments. Letters indicate statistical differences determined by Tukey's test following ANOVA (p<0.005).
